# Supplementary material for: One-step hydrothermal synthesis of magnetic responsive TiO2nanotubes/Fe3O4/graphene composites with desirable photocatalytic properties and reusability
Source: Royal Society of Chemistry journal article supplement (doi:10.1039/c6ra03389j), 2016-01-01
Supplement: c6ra03389j1.pdf [file c6ra03389j1.pdf]

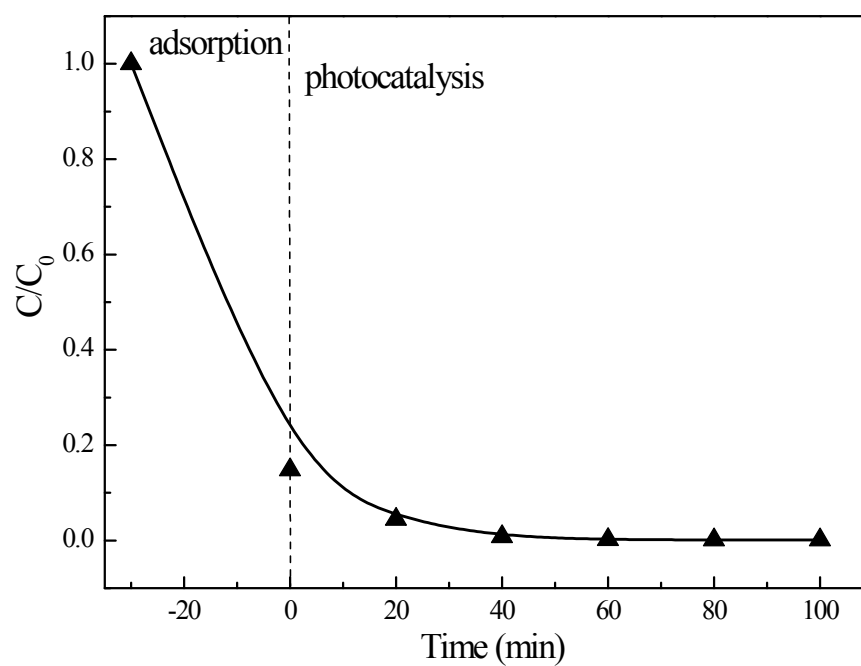

Fig S1. The adsorption ability and photocatalytic performance of TNTs/Fe<sub>3</sub>O<sub>4</sub>/GN composites for Rhodamine B
